# Supplementary material for: Single-molecule sequence detection via microfluidic planar extensional flow at a stagnation point
Source: Royal Society of Chemistry journal article supplement (doi:10.1039/b926847b), 2010-01-01
Supplement: b926847b.pdf [file b926847b.pdf]

## Single-molecule sequence detection via microfluidic planar extensional flow at a stagnation point

Rebecca Dylla-Spears<sup>1</sup>, Jacqueline E. Townsend<sup>2</sup>, Linda Jen-Jacobson<sup>2</sup>, Lydia L. Sohn<sup>3</sup>, and Susan J. Muller<sup>1</sup>

<sup>1</sup> Department of Chemical Engineering, University of California, Berkeley

<sup>2</sup> Department of Biological Sciences, University of Pittsburgh

<sup>3</sup> Department of Mechanical Engineering, University of California, Berkeley

### Supporting Information

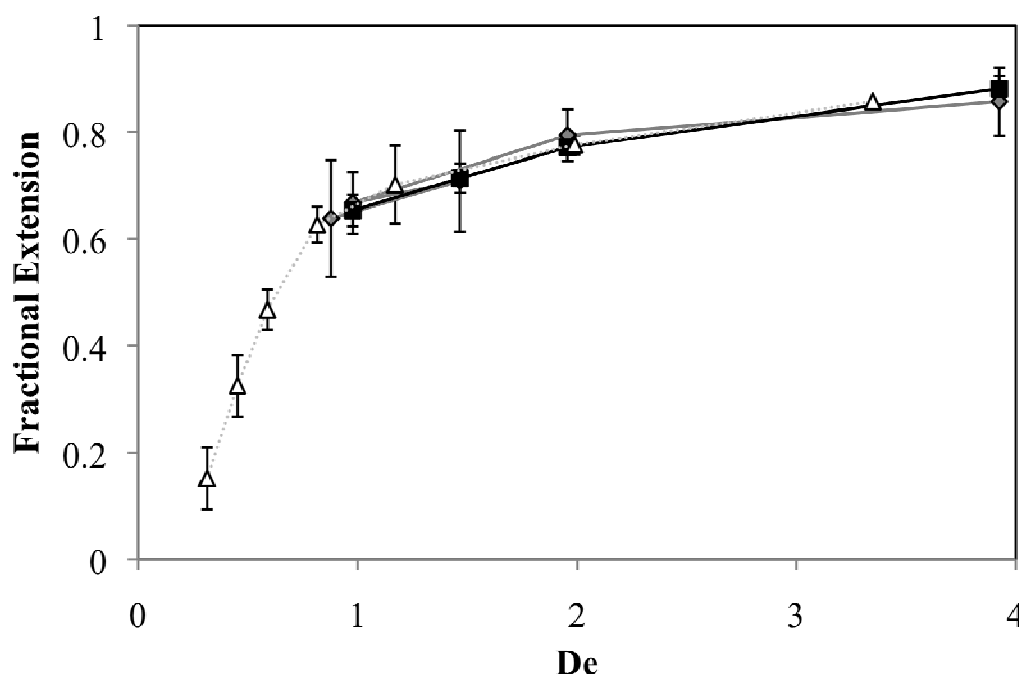

**Figure S-1.** DNA extension variation with  $De$  at the stagnation point of the cross slot. Results are shown for both DNA molecules (black squares) and marker-DNA complexes (gray diamonds) in EcoRI visualization buffer. Each data point is the average fractional extension of an ensemble of  $N > 22$  stained  $\lambda$ -DNA molecules trapped for at least 3 strain units at the stagnation point. Strain rates were calculated using 2D fluid dynamics simulation at centerline velocities using Comsol. Results from Perkins *et al.* (white triangles) for DNA in a different buffer system are provided for comparison.<sup>1</sup>

1. T.T. Perkins, D.E. Smith, and S. Chu, *Science*, 1997, **276**, 2016-2021.

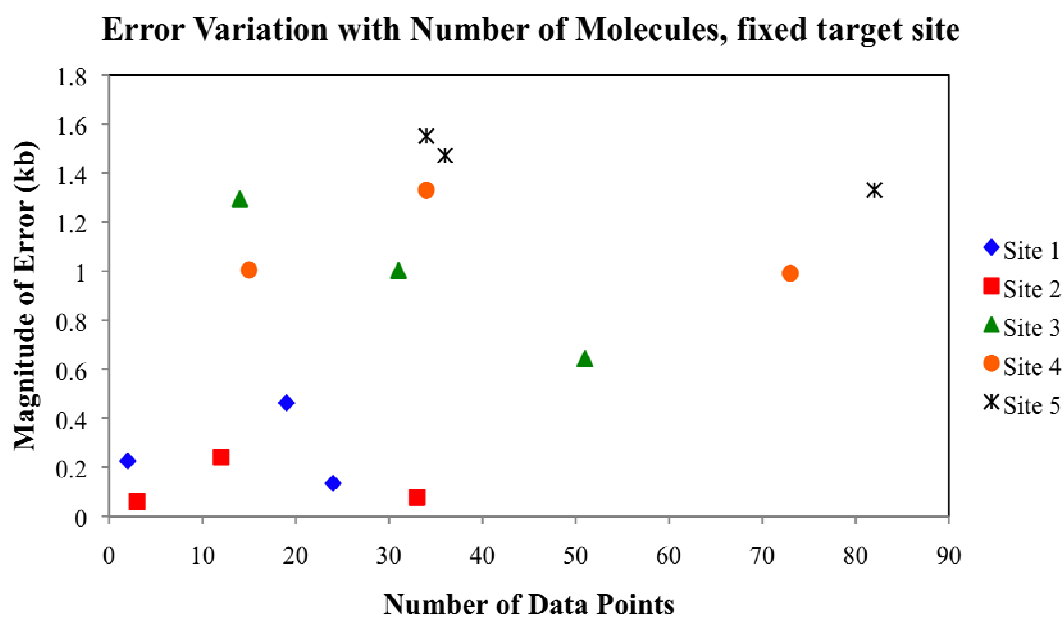

**Figure S-2.** Error variation with size of population at fixed target site for molecules extended at  $De = 1, 1.5$ , and  $3.9$ . Note that the magnitude of the error does not uniformly decrease as more molecules are included in the analysis.

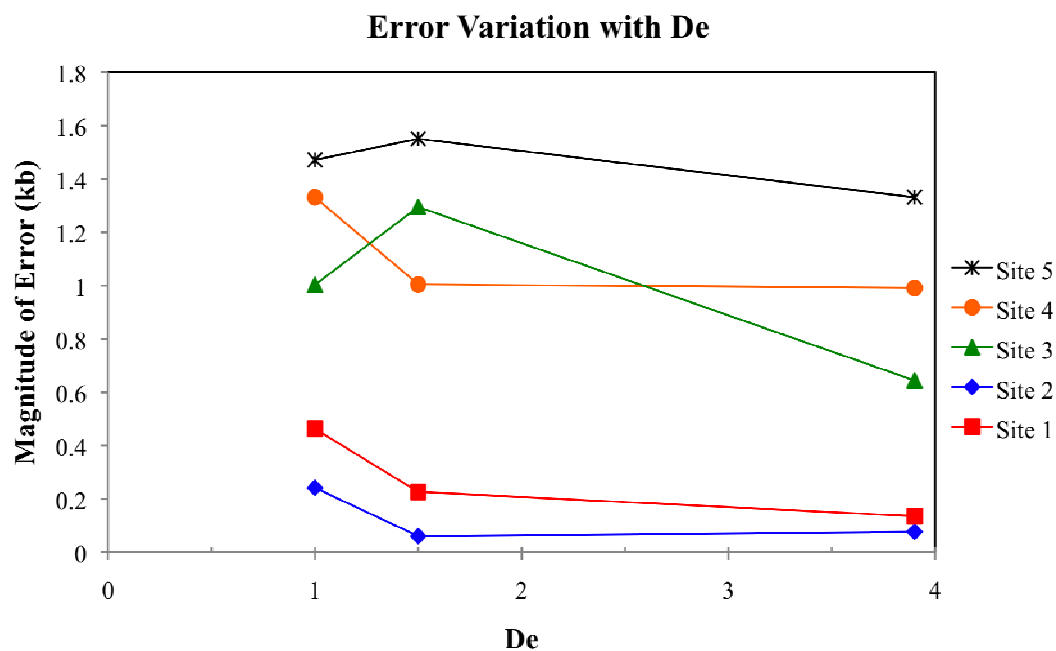

**Figure S-3.** Variation in error with De at the five target sites. The sites are ordered sequentially on  $\lambda$ -DNA as described in the text, with site 5 being nearest the end of the DNA. Sites 1 and 2 straddle the center of the molecule. Error magnitude increases with distance from the center of the molecule.

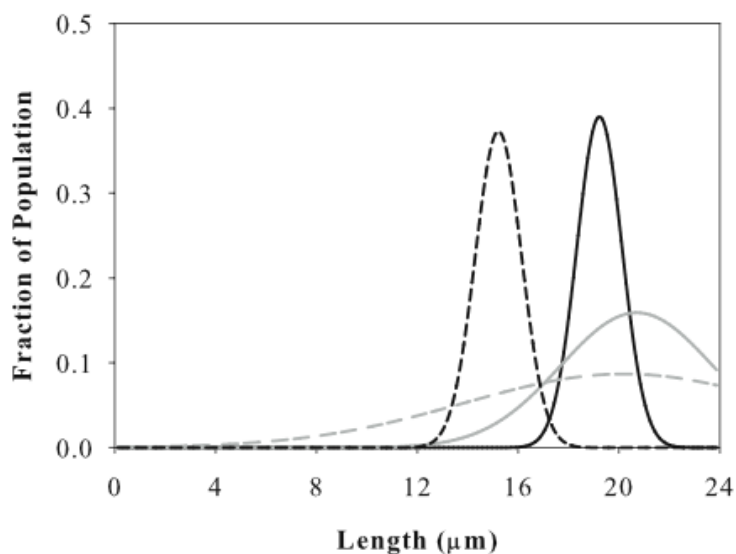

**Figure S-4.** Best-fit Gaussian length distributions for populations of measured marker-DNA complexes. Broken gray line includes data for all complexes stretched and measured on slides. Solid gray line represents only slide-stretched complexes with  $x/L > 0.75$ . Black lines represent molecules stretched and measured in extensional flow at  $De = 1$  (broken) and  $De = 3.9$  (solid) and give much narrower distributions than molecules stretched on slides.

| Incubation Condition | N   | <x>/L          | Site 1:<br>21.226 kb |                  | Site 2:<br>26.105 kb |                  | Site 3:<br>31.747 kb |                  | Site 4:<br>39.169 kb |                  | Site 5:<br>44.973 kb |                  |
|----------------------|-----|----------------|----------------------|------------------|----------------------|------------------|----------------------|------------------|----------------------|------------------|----------------------|------------------|
|                      |     |                | $\Delta$<br>(kb)     | $\sigma$<br>(kb) |
| Unmixed              | 130 | 0.89<br>(0.04) | -0.1                 | 0.8              | +0.2                 | 1.0              | +0.9                 | 1.5              | +0.9                 | 0.9              | +1.2                 | 0.9              |
| Mixed                | 133 | 0.86<br>(0.03) | -0.2                 | 0.8              | 0                    | 0.5              | +0.7                 | 1.2              | +0.8                 | 1.1              | +1.2                 | 1.0              |

**Table S-1.** Gaussian best-fit statistics for histograms produced using marker-DNA complexes trapped and stretched at the stagnation point of a planar extensional flow at  $De = 3.9$ . Populations were either continually mixed during marker-DNA incubation or incubated with no mixing. Error  $\Delta$  and precision  $\sigma$  are reported as described in Table 1.
